# Supplementary material for: Stephanoascus ciferrii Complex: The Current State of Infections and Drug Resistance in Humans
Source: MDPI journal article supplement (doi:10.3390/jof10040294), 2024-04-18
Supplement: s1 [file s1]

| Geographic area | America |         |        |        |        |        |        | Europe |         |         | Asia  |       |       |            |          | Middle East |
|-----------------|---------|---------|--------|--------|--------|--------|--------|--------|---------|---------|-------|-------|-------|------------|----------|-------------|
|                 | Florida | Georgia | Oregon | Hawaii | Kansas | Brazil | Mexico | France | Austria | Romania | Japan | India | China | Bangladesh | Malaysia | Turkey      |
| N° of isolates  | 1       | 1       | 1      | 1      | 1      | 1      | 2      | 18     | 1       | 1       | 1     | 8     | 37    | 12         | 3        | 3           |

|                                                             | 1983 | 1990 | 1995 | 2001 | 2004 | 2011 | 2013 | 2014 | 2015 | 2018 | 2019 | 2021 | 2022 |
|-------------------------------------------------------------|------|------|------|------|------|------|------|------|------|------|------|------|------|
| N° <i>S. ciferri</i> complex isolated from clinical samples | 5    | 6    | 12   | 2    | 1    | 1    | 4    | 1    | 7    | 4    | 2    | 33   | 12   |

[illegible]

|                 |   |   |   |   |   |   |    |   |   |
|-----------------|---|---|---|---|---|---|----|---|---|
| Antimetabolites | 0 | 1 | 0 | 0 | 0 | 3 | 17 | 0 | 0 |
| Polyenes        | 0 | 0 | 0 | 1 | 0 | 0 | 4  | 6 | 1 |

**Table S3.** Antifungal resistance in *S. ciferrii* complex strains isolated from humans in different countries. The highest azole-resistance rates have been documented in China, France and Bangladesh. Echinocandin-resistance has been described only in Turkey. China is the country with the highest antimetabolite (5-FU)-resistance rate while resistance to polyenes (AmB) has been described in Bangladesh and China. AmB, Amphotericin B; 5-FU, 5-Fluorocytosine.
